# Supplementary material for: Mitoflash altered by metabolic stress in insulin-resistant skeletal muscle
Source: PubMed Central journal article supplement (PMC4589561; doi:10.1007/s00109-015-1278-y), 2015-04-25
Supplement: 109_2015_1278_MOESM1_ESM.pdf [file 109_2015_1278_MOESM1_ESM.pdf]

Electronic Supplementary Material

**Mitoflash altered by metabolic stress in insulin-resistant skeletal muscle**

Yi Ding, Huaqiang Fang, Wei Shang, Yao Xiao, Tao Sun, Ning Hou, Lin Pan, Xueting Sun, Qi Ma, Jingsong Zhou, Xianhua Wang, Xiuqin Zhang, and Heping Cheng

**Supplemental methods**

*Genotyping of mt-cpYFP db/db mice* Genotyping for *mt-cpYFP* insertion was performed by PCR using mouse-tail DNA that isolated with a genomic DNA isolation kit (Qiagen). PCR primers for *mt-cpYFP*: 5'-GCACAAGCTGGAGTACAACGGT-3' (forward) and 5'-GATGACCTCTTTATAGCCAACCT-3' (reverse). *Gapdh* fragment was used as internal control (forward primer: 5'-AGGCCGGTGCTGAGTATGTC-3' and reverse primer: 5'-TGCCTGCTTCACCACCTTCT-3'). Specific primers were used for production of *Lepr* fragment (forward primer: 5'- AGA ACG GAC ACT CTT TGA AGT CTC-3' and reverse primer: 5'- CAT TCA AAC CAT AGT TTA GGT TTG TGT-3'). The *Leptin receptor (Lepr)* mutation was detected by restriction enzyme (*RsaI*) digested fragments of the *Lepr* gene PCR product.

*In vivo electroporation* mt-PAGFP was transiently expressed in muscles of 12-week-old mice by in vivo electroporation. In vivo electroporation method was

adapted from a previous report [1]. Briefly, in the hindlimb of anaesthetized 12-week-old db/m or db/db mice (pentobarbital sodium, 40 mg/kg body weight, i.p.), hyaluronidase (Sigma) and mt-PAGFP plasmid (a kind gift from Dr. Mariusz Karbowski) were injected subcutaneously in sequence. Electronic stimulation with 20 pulses of square-wave were applied at 1 Hz (ECM 830 Electro Square Porator, BTX). In vivo imaging was carried out 10 days later using procedures similar to those described above.

*Single skeletal muscle cell isolation and culture* The method was adapted from previous report [2]. Briefly, surgically-excised mouse flexor digitorum brevis (FDB) muscle was incubated in DMEM supplemented with 2% FBS and 4 mg/ml collagenase A for 1.5-2 h to yield single FDB myofibers. Aliquots were taken randomly and deposited into each well of XF24 cell culture microplates and cultured for 12-16 h.

## **Reference**

1. Luo G, Yi J, Ma C, Xiao Y, Yi F, Yu T, Zhou J (2013) Defective mitochondrial dynamics is an early event in skeletal muscle of an amyotrophic lateral sclerosis mouse model. PLoS One 8: e82112.
2. Schuh RA, Jackson KC, Khairallah RJ, Ward CW, Spangenburg EE (2012) Measuring mitochondrial respiration in intact single muscle fibers. Am J Physiol Regul Integr Comp Physiol 302: R712-719.
